COMMUNITY PAGE

# Strength in numbers: Collaborative science for new experimental model systems

Ross F. Waller<sup>1\*</sup>, Phillip A. Cleves<sup>2</sup>, Maria Rubio-Brotons<sup>3</sup>, April Woods<sup>4</sup>, Sara J. Bender<sup>5</sup>, Virginia Edgcomb<sup>6</sup>, Eric R. Gann<sup>7</sup>, Adam C. Jones<sup>5</sup>, Leonid Teytelman<sup>8</sup>, Peter von Dassow<sup>9,10</sup>, Steven W. Wilhelm<sup>7</sup>, Jackie L. Collier<sup>11\*</sup>

**1** Department of Biochemistry, University of Cambridge, Cambridge, United Kingdom, **2** Department of Genetics, Stanford University School of Medicine, Stanford, California, United States of America, **3** Institut de Biologia Evolutiva, Spanish National Research Council (CSIC)–Universitat Pompeu Fabra, Barcelona, Catalonia, Spain, **4** Environmental Biotechnology Lab, Moss Landing Marine Laboratories, California, United States of America, **5** Gordon and Betty Moore Foundation, Palo Alto, California, United States of America, **6** Department of Geology and Geophysics, Woods Hole Oceanographic Institution, Woods Hole, Massachusetts, United States of America, **7** Department of Microbiology, The University of Tennessee, Knoxville, Tennessee, United States of America, **8** protocols.io, Berkeley, California, United States of America, **9** Facultad de Ciencias Biológicas, Pontificia Universidad Católica de Chile, Santiago, Chile, **10** Instituto Milenio de Oceanografía, Concepción, Chile, **11** School of Marine and Atmospheric Sciences, Stony Brook University, Stony Brook, New York, United States of America

\* [rfw26@cam.ac.uk](mailto:rfw26@cam.ac.uk) (RFW); [jackie.collier@stonybrook.edu](mailto:jackie.collier@stonybrook.edu) (JLC)

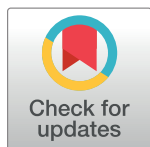

**OPEN ACCESS**

**Citation:** Waller RF, Cleves PA, Rubio-Brotons M, Woods A, Bender SJ, Edgcomb V, et al. (2018) Strength in numbers: Collaborative science for new experimental model systems. *PLoS Biol* 16(7): e2006333. <https://doi.org/10.1371/journal.pbio.2006333>

**Published:** July 2, 2018

**Copyright:** This is an open access article, free of all copyright, and may be freely reproduced, distributed, transmitted, modified, built upon, or otherwise used by anyone for any lawful purpose. The work is made available under the [Creative Commons CC0](https://creativecommons.org/licenses/by/4.0/) public domain dedication.

**Funding:** The author(s) received no specific funding for this work.

**Competing interests:** I have read the journal's policy and the authors of this manuscript have the following competing interests. Leonid Teytelman is an employee of protocols.io and owns equity in the company. Adam C. Jones and Sara J. Bender are employees of the Gordon and Betty Moore Foundation.

**Abbreviations:** 35S, cauliflower mosaic virus 35S RNA promoter; MV, cytomegalovirus promoter; EDGE, Enabling Discovery through GEnomic Tools; EMS, Experimental Model Systems; PROT-G, Protist Research to Optimize Tools in Genetics.

**Provenance:** Not commissioned; externally peer reviewed

## Abstract

Our current understanding of biology is heavily based on a small number of genetically tractable model organisms. Most eukaryotic phyla lack such experimental models, and this limits our ability to explore the molecular mechanisms that ultimately define their biology, ecology, and diversity. In particular, marine protists suffer from a paucity of model organisms despite playing critical roles in global nutrient cycles, food webs, and climate. To address this deficit, an initiative was launched in 2015 to foster the development of ecologically and taxonomically diverse marine protist genetic models. The development of new models faces many barriers, some technical and others institutional, and this often discourages the risky, long-term effort that may be required. To lower these barriers and tackle the complexity of this effort, a highly collaborative community-based approach was taken. Herein, we describe this approach, the advances achieved, and the lessons learned by participants in this novel community-based model for research.

## Introduction

Biology often progresses in an incremental manner, each advancement a logical extension of previous discoveries building growing networks of understanding. But this pattern can result in research following paths of lesser resistance and an uneven distribution of knowledge and understanding. Breaking from these paths with larger leaps into the unknown is required for more balanced and comprehensive knowledge of the world around us. However, making these leaps entails considerable risk due to the uncertainties of the progress that will be made and the timeframe and investment that this will take. The larger and more complex the challenge,

the greater the risk. Confronting such risks as individuals or small teams alone is formidable, and there are many pressures that might dissuade such ambitions. New models of research support and coordination have the potential to lower these barriers to embracing and surmounting such challenges.

In biology, model organisms represent both a strength and a weakness in how research effort is often organized and performed. Model organisms are accessible taxa that can be studied and manipulated in controlled ways to answer defined experimental questions. Great effort is often required to develop and refine the tools necessary for such models, and once developed, they are widely exploited as accessible conduits to biological answers. Genetically tractable model organisms have enabled enormous progress in understanding life, but the small number of model organisms available represent a taxonomically restricted view of biological diversity [1,2]. This imbalance means that a relatively small number of organisms have been used to define “the canonical” in eukaryotes.

Eukaryotes, however, are incredibly diverse, with most of this diversity represented by single-celled protists, which are typically more phylogenetically divergent from one another than animals are from fungi (Fig 1) [3]. The vast evolutionary history of protists is reflected in striking differences in gene content, form, behavior, and ecological function [4]. Including the breadth of eukaryotic diversity is essential for understanding both ancestral eukaryotic characters as well as their diversification, for example, the acquisition and evolution of organelles through endosymbiosis [5]. Similarly, the origins and diversity of sex is profoundly informed by studying diverse protists [6,7]. Diversity teaches us about the full range of evolutionary possibility and, in turn, the functional complexity of our environment.

Here, we describe the ambition to greatly extend the range of genetically tractable model organisms within diverse marine protists, the strategies developed to meet this challenge, and the resources available to enable others to continue this task. The size and breadth of this goal required a new model for scientific community building, interaction, and support. In particular, there was a need for bringing together diverse skill groups and expertise; allowing ideas and results to be presented and readily disseminated independently from the peer-review process, which is inevitably slow and biased towards positive, complete outcomes; and strategically allocating resources to optimize success within a very unpredictable landscape. The strategies employed provide a model for research that has broad applicability across many grand challenges in science and technology.

## Experimental model systems in marine protists

Diverse protists are central to global biogeochemistry. The oceans dominate the planet’s surface, and marine protists drive vital ecological processes, notably marine primary production, carbon capture, and nutrient cycling [9]. In addition, they influence weather cycles and coastal protection by corals and create population blooms spanning hundreds of kilometers with both positive and negative impacts on food production and water quality [10–12]. Thus, understanding the ecological functions of specific marine protists is essential to the understanding of global ecosystems.

In recent years, genome-wide sequencing technologies have allowed rapid advancement in assessing marine protist genetic diversity, which has enabled many predictions of cell and organism function based on gene content [13]. These studies have also revealed that often approximately 40%–60% of the genes in any newly sequenced lineage encode proteins with no known function based on homology with other organisms. For example, about half the genes in a global *Tara* Oceans metatranscriptome assembly have no similarity to known proteins [4]. These unknown genes are likely important in defining the distinct ecological contributions of

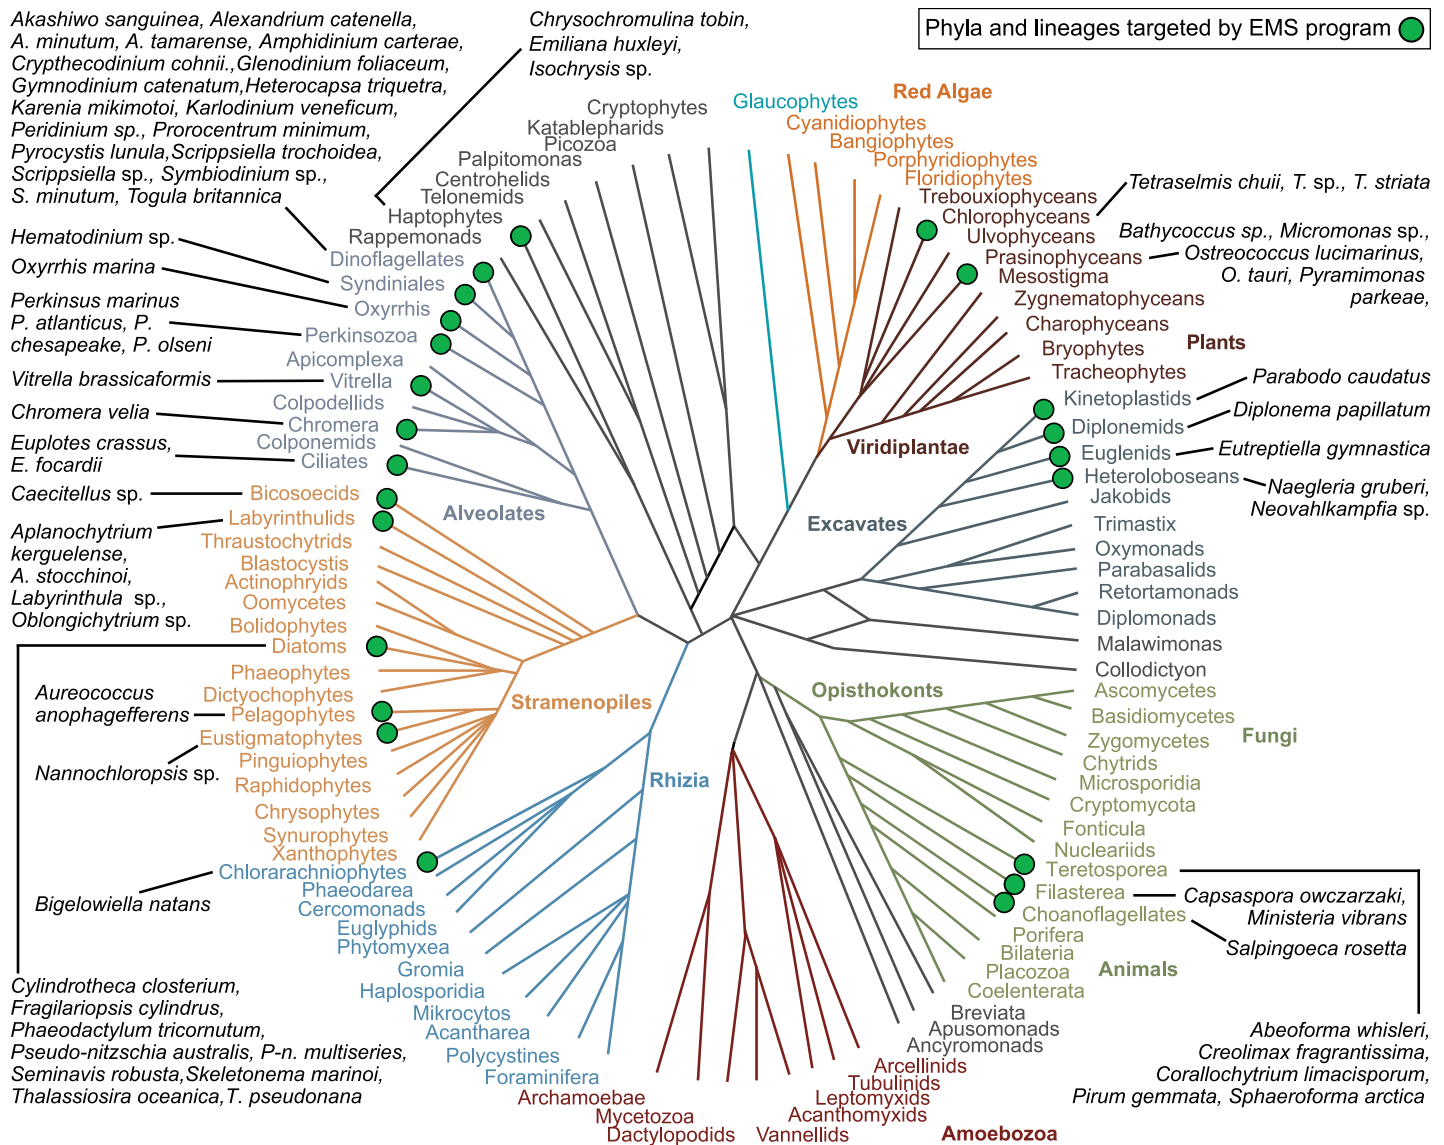

**Fig 1. Schematic of relationships of major eukaryotic lineages with taxa the subjects of EMS projects indicated with green dots and listed in black text.** The phylogeny is modelled on Keeling and colleagues (2014) [8]. EMS, Experimental Model Systems; sp., species.

<https://doi.org/10.1371/journal.pbio.2006333.g001>

each lineage; however, experiments to determine the functions and importance of such genes are impeded by the lack of genetic methods.

While the need to develop more model marine organisms is clear, many factors create obstacles or disincentives to embracing this challenge. Multiple layers of uncertainty translate to a perceived or actual high risk of failure: Can DNA or RNA be introduced into the relevant cell compartment, and will it be maintained? Will genes be expressed, will their products be detectable, and can selection of transformants be achieved? Will the organism tolerate any or all of these treatments? Furthermore, funding, publishing, and career advancement structures often do not encourage such risk-taking enterprises. These compounded uncertainties and risks contribute to a reluctance to commit time and resources to novel genetic model development.

To address these obstacles, in 2015, the Gordon and Betty Moore Foundation launched a US\$8.1M portfolio of one- and two-year grants as part of its Marine Microbiology Initiative.

This new Experimental Model Systems (EMS) program was designed to foster a collaborative, community-oriented approach to the expansion of genetically tractable models within marine protists and to promote the power of genetic approaches for studying marine microbial processes amongst the scientists and students working in these fields. Based on the early success of the program, many projects were continued through an additional US\$4.5M of support in 2017.

Beginning with an open call for proposals, the Moore Foundation selected 34 project teams to develop new genetic tools in marine protists. Teams were encouraged to be interdisciplinary—often featuring complementary experts with experience in well-established model systems, such as yeast, as well as marine protists—providing a mechanism to bring diverse skills and innovative approaches to the projects. Nine of the EMS projects focused on protists for which basic genetic techniques were already available (primarily diatoms), enabling the development of more advanced forward and reverse genetics methods. The remaining 25 projects focused on a diverse array of protists for which reliable transformation had not yet been achieved. This project portfolio had the explicit goal of enabling the scientists working on less-explored organisms to learn directly from the successes made with the more advanced model protists. A key EMS strategy was to provide strong support for community building and dialogue between groups to encourage productive interactions and sharing. Over the course of the two years, this EMS effort developed a novel model for research that has enabled significant progress in genetic tool development in marine protists. This model is broadly applicable to other groups of scientists and/or funding organizations wanting to embark on equivalent high-risk complex projects, such as the United States National Science Foundation’s Enabling Discovery through GENomic Tools (EDGE) program.

## Organisms and approaches

Target organisms nominated by research teams were selected to represent the broad ecological and phylogenetic diversity of marine protists. Most of the major eukaryotic supergroups were represented: opisthokonts, excavates, viridiplantae, alveolates, stramenopiles, haptophytes, and rhizarians (Fig 1). Nearly half of the targeted organisms were photoautotrophs, approximately 40% were osmoheterotrophs or phagotrophs, and the remainder were mixotrophs (both phototrophic and heterotrophic) or parasitic. Most of the targeted organisms were from temperate ocean habitats, although three polar organisms were included. Half of the targeted organisms were planktonic, including species capable of forming harmful algal blooms (mainly dinoflagellate and diatom), and approximately 20% of the targeted organisms were symbionts, including parasites, of marine plants or animals. Although most protists studied were available in existing laboratory cultures, a small number of projects also attempted to directly transform natural protist communities within environmental samples. The broad assortment of growth requirements, cell surface and wall structures, genome organizations, and gene-regulation mechanisms of the target protists posed a multifaceted challenge to the community engaged in developing these new genetic model organisms. However, this diversity also provided an opportunity to investigate the mechanistic basis of a wide variety of biological processes in the ocean.

After the first two years of the EMS program, EMS researchers were surveyed (November 15th, 2017) to capture the breadth of transformation techniques trialed while also measuring successes achieved and persistent challenges. At least seven different methods of DNA or RNA introduction were attempted (Table 1), with electroporation being the method both most tested and successful. The strongest collective effort was applied to diatoms (Bacillariophyceae) and “core” dinoflagellates (Dinophyceae), owing to their abundance, diversity, and ecological

**Table 1. EMS investigators' survey summary.**

| Organisms                        | Methods of transfection      | Reporters   | Promoters      | Status                                                      |
|----------------------------------|------------------------------|-------------|----------------|-------------------------------------------------------------|
| <b>Stramenopiles</b>             |                              |             |                |                                                             |
| Diatoms (Bacillariophyceae)      | Elec, Ecoli, Agro, Bomb, PEG | AR, FP, GUS | native         | stable transformation in many strains and by several groups |
| Pelagophytes                     | Elec, Ecoli                  | AR, FP      | native and exo | transient expression                                        |
| Eustigmatophytes                 | Elec                         | FP          | exo            | transient expression                                        |
| Labyrinthulids                   | Elec, Sono                   | AR          | native         | stable transformation                                       |
| <b>Alveolates</b>                |                              |             |                |                                                             |
| Syndiniales                      | Elec, Bead                   | FP          | native         | no transgene expression yet                                 |
| Dinoflagellates (Dinophyceae)    | Elec, Bead, Bomb             | FP          | native and exo | no transgene expression yet                                 |
| Perkinsozoa                      | Elec                         | AR, FP      | native         | stable transformation                                       |
| <b>Haptophytes</b>               |                              |             |                |                                                             |
| Prymnesiophyceae                 | Elec, Bomb                   | AR, FP      | native and exo | stable transformation                                       |
| <b>Viridiplantae</b>             |                              |             |                |                                                             |
| Chlorophyceans                   | Bomb                         | AR, HR      | native         | transient expression                                        |
| Prasinophytes                    | Elec                         | FP          | native         | no transgene expression yet                                 |
| <b>Excavates</b>                 |                              |             |                |                                                             |
| Kinetoplastids                   | Elec                         | FPs         | native and exo | stable expression                                           |
| Diplonemids                      | Elec                         | AR          | native         | stable transformation                                       |
| Heteroloboseans                  | Elec                         | AR, FP      | native         | transient expression                                        |
| <b>Opisthokonts</b>              |                              |             |                |                                                             |
| Teretosporea                     | Elec                         | FP          | native         | stable and transient expression                             |
| Choanoflagellates                | Elec                         | FP          | native         | transient expression                                        |
| <b>Mixed Natural Communities</b> | Elec                         | FP          | exo            | possibly transient expression                               |

Further methods details for many taxa are available at PROT-G (protocols.io). **Abbreviations:** Agro, conjugation with *Agrobacterium*; AR, antibiotic resistance; Beads, glass beads; Bomb, particle bombardment; Ecoli, conjugation with *E. coli*; Elec, electroporation; EMS, Experimental Model Systems; exo, exogenous; FP, fluorescent proteins; GUS, beta-glucuronidase; HR, herbicide resistance; PEG, polyethylene glycol; PROT-G, Protist Research to Optimize Tools in Genetics; Sono, sonoporation.

<https://doi.org/10.1371/journal.pbio.2006333.t001>

importance [14]. The transgenes used were typically for the expression of antibiotic resistance proteins for selection or fluorescent reporter proteins for visual identification of successful transformants (Table 1). In most cases, these transgenes were flanked by native promoter and terminator elements to increase the likelihood of expression. Other strategies used “universal” promoters (e.g., cauliflower mosaic virus 35S RNA promoter, 35S; and cytomegalovirus promoter, CMV) when targeting multiple diverse taxa simultaneously, including two efforts to bulk transform natural plankton communities. Of the 15 major taxonomic classes represented in the survey results, stable transformation was achieved in six, and at least transient expression of the transgene was achieved in an additional six (Table 1, Fig 2). Survey respondents rated how much effort they had put into each transformation method and taxon as high, medium, or low. The amount of effort generally positively correlated with at least some success of transgene expression and/or maintenance, providing evidence for the value of long-term support for such ventures. The taxonomic group most recalcitrant to transformation despite effort was the dinoflagellates, a group whose distinctive nuclear biology is also least well understood [15–17].

### Building community

A key component of the EMS strategy was to support exchange and discussion of methods details among EMS researchers. To achieve this goal, Moore Foundation staff and research



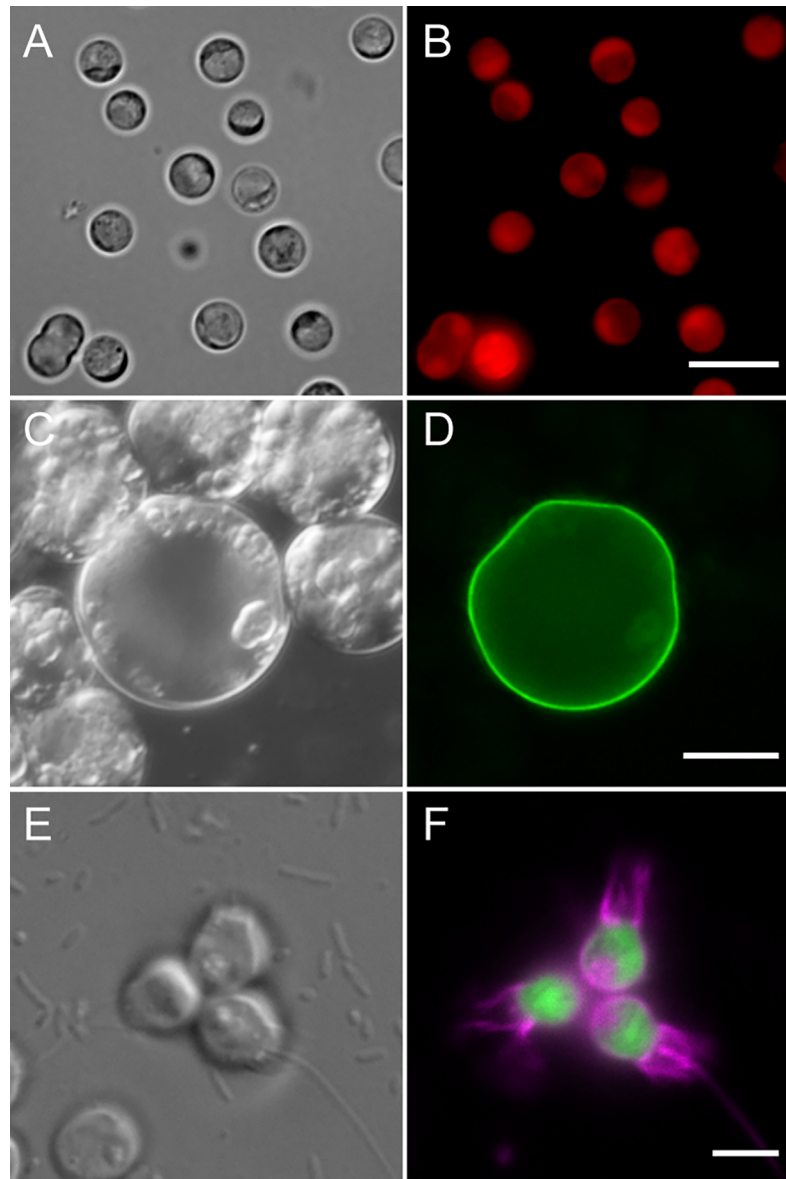

**Fig 2. Examples of EMS transformed protists.** (A, B) *Corallochytrium limacisporium* stably expressing the mCherry fluorescent protein (red) fused to a puromycin resistance protein driven by an endogenous actin promoter (M. Rubio-Brotos, UPF-CSIC, Barcelona, Spain). (C, D) *Perkinsus olseni* (marine bivalve parasite) expressing a GFP (green) fusion with an exported cell-wall protein (R. Waller, University of Cambridge, United Kingdom). (E, F) The choanoflagellate *Salpingoeca rosetta* transformed with a plasmid expressing fluorescent proteins that illuminate the cell body (green) and the plasma membrane (magenta) (D. Booth, University of California Berkeley, United States of America). Scale bar = 5  $\mu\text{m}$ , 20  $\mu\text{m}$ , and 5  $\mu\text{m}$  for B, D, and F, respectively. EMS, Experimental Model Systems; GFP, green fluorescent protein; UPF-CSIC, Universitat Pompeu Fabra-Spanish National Research Council.

<https://doi.org/10.1371/journal.pbio.2006333.g002>

teams engaged in multiple approaches to foster communication and collaboration. The intent was to create an environment open to sharing and with a low barrier of entry, to disseminate both positive as well as negative results rather than only the positive outcomes typically released via peer-reviewed publication, and to encourage rapid sharing in weeks or months rather than years. Early in the program cycle, a “kick-off” meeting was held in Heidelberg, Germany, including approximately 50 of the scientists involved and across all career stages. This

meeting focused on building connections and sharing ideas and strategies. Several further Foundation-sponsored EMS-themed conference events were held throughout the grant period to encourage further interaction both between teams and beyond. In parallel with these in-person meetings, quarterly “Virtual Convening” webinars provided a forum for all community members to share the progress and challenges of their projects. These events featured presentations from two or three speakers working on different taxa and ample time for questions and feedback from the community, with 25–30 participants per convening. The virtual gatherings brought together researchers in a “lab meeting” atmosphere without requiring additional travel and resources.

To further accelerate the pace of idea exchange among researchers, the EMS program supported the web-based open-access platform [protocols.io](https://www.protocols.io) [18] to establish a dedicated user group, “Protist Research to Optimize Tools in Genetics” (PROT-G [<https://www.protocols.io/groups/protist-research-to-optimize-tools-in-genetics-protg>]; <https://www.protocols.io/casestudies/>). This online group facilitated protocol sharing and discussions among the grantees and any other researchers interested in protist genetics or model systems (PROT-G is a freely accessible public resource). Protocols.io staff enlisted graduate student and postdoctoral site users to act as ambassadors to promote PROT-G at their institutions and at conferences. As of May 31st, 2018, PROT-G contained 144 public protocols, 160 members, and 48 ongoing discussions that map globally between EMS research teams (Fig 3). Survey data from the EMS community also reported that most respondents (approximately 80%) had engaged in and benefited from the interactions between teams that the virtual meetings and PROT-G network had allowed, including the sharing of “negative” results (Fig 3). This community-oriented model of science operating independently from the traditional publication pathway has very clear benefits for tackling challenging, multifaceted research programs.

### Lessons learned, challenges, and the future

The prospect of failure often deters scientists from embarking on high-risk projects. “Negative” results are viewed as difficult to publish and are frequently buried in laboratory

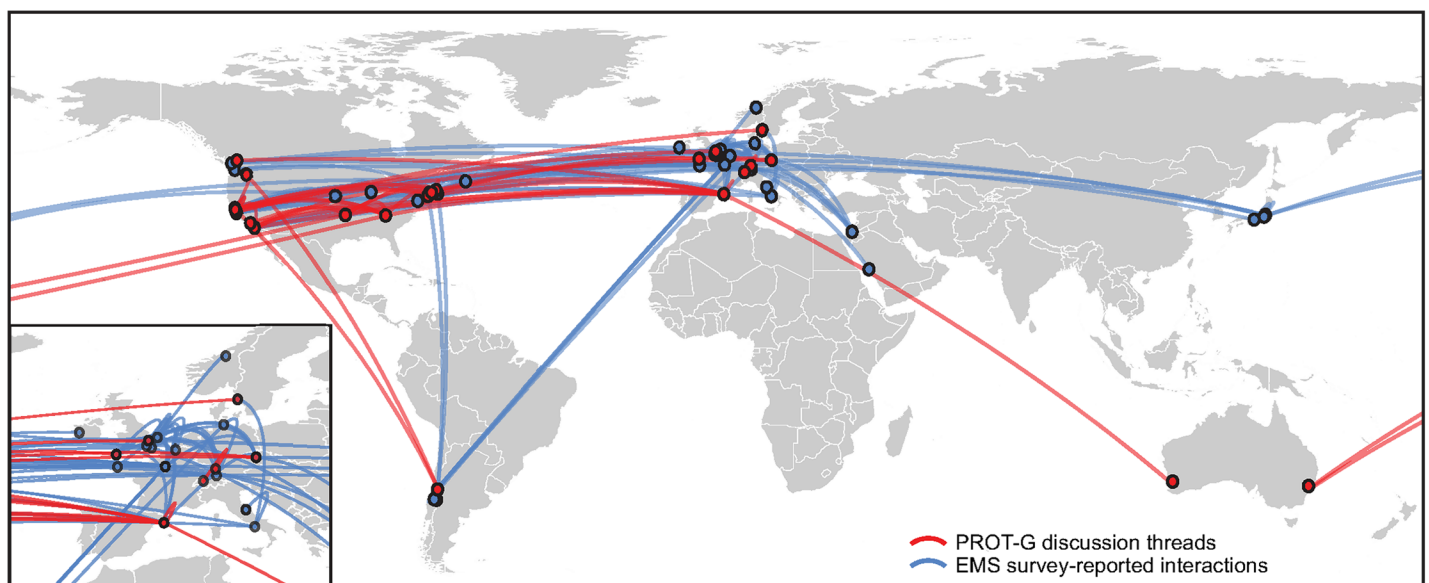

**Fig 3. Global EMS network map of protocols.io PROT-G discussion threads (red) and further direct discussions and interactions (blue) between program teams reported in the EMS survey.** EMS, Experimental Model Systems; PROT-G, Protist Research to Optimize Tools in Genetics.

<https://doi.org/10.1371/journal.pbio.2006333.g003>

notebooks with, at best, some word-of-mouth communication between colleagues. The value of sharing these results and making such information readily accessible was brought into clear focus through the frequent meetings and discussions within the EMS community. Our concerted effort to genetically transform new and often recalcitrant taxa provided a platform for discussion and comparison of approaches taken, enabling a fuller assessment of different methods, progress, and outstanding challenges. *Protocols.io* provided a platform for this sharing of methods, irrespective of their level of progress towards success, and these published methods now provide an inventory of details of approaches taken, effort made, outcomes as they stand, and contact details of the researchers involved. This evolving resource will continue to inform and support researchers engaging in the EMS challenge.

The program recognized from the outset that this large, multivariate challenge required broad and cooperative contributions from many research teams representing different expertise and experience. A community was built that nucleated around a set of common goals, minimized effort duplication, and leveraged the research strengths of each team. For many program members, this community-based effort was a unique research experience and a welcome alternative to individual, competitive-style research. An initial challenge was to overcome the tendency of scientific teams to keep research results private until publication. This challenge was met by the early use of the Virtual Convening events to share initial strategies, data from transformation attempts, and progress updates, making the benefits of this exchange quickly apparent. A sense of community participation and support was also fostered by researchers publishing and discussing experimental method details in the *protocols.io* domain before release into the peer-reviewed public space. These strategies for community formation and participation are likely relevant to many other multi-group research programs.

From a funding perspective, the EMS strategy was to spread resources among a relatively large number of teams working on different organisms and approaches. One year of funding was provided to a wide collection of teams to “test the water” for early signs of organism genetic tractability. Funding was then provided for up to two additional years when early progress was demonstrated. This element of the program aimed to maximize the likelihood for positive outcomes and to lower the risk for overall progress where success was otherwise difficult to predict among such diverse biological systems. While this provided welcome support for high-risk endeavors, it remains difficult to assess if the persistent challenges in some taxa would be overcome with more time and greater effort.

The EMS program has ignited new drive, progress, and resources to overcome what many in the fields of marine protistology, ecology, and oceanography have recognized as a significant obstacle to understanding these complex and important biological systems. But how do researchers maintain this momentum beyond the duration of the EMS program? For the organisms still recalcitrant to transformation, how can scientists move forward, avoiding the notion that this cause would not benefit from additional support? These are some of the challenges that the EMS community now must grapple with and embrace. For many involved, however, this program has also been a positive new experience in community-driven research. It has provided a model for tracking, quantifying, and sharing progress across a wide network much more rapidly and completely than the traditional publishing paradigm. Furthermore, there has been real collective success in technology development and diffusion (including 17 publications citing EMS funding as of April 30th, 2018), which has substantially lowered the barriers to testing new organisms as potential future models. As individual teams’ research programs now move forward, we will see the rewards of hypothesis-driven experiments that these new tools allow and advances in our understanding of ocean organisms and ecosystems. Applying this momentum to surmounting other large, complex obstacles will require continued recognition and promotion of the value of ongoing support for technology development



programs such as EMS both to federal funding agencies and policy makers as well as to charitable trusts and foundations.

## Acknowledgments

We thank the EMS Advisory Committee Bonnie Bassler (Princeton), Vicki Chandler (Minerva Schools), and John Pringle (Stanford), and the many researchers participating in the EMS effort. We also thank Jose-Antonio Fernandez Robledo for discussions on the manuscript. The research efforts, connections, and collaborations described in this paper and *protocols.io* (<https://www.protocols.io/>) were supported by the Gordon and Betty Moore Foundation's Marine Microbiology Initiative.

## References

1. Goldstein B, King N. The future of cell biology: emerging model organisms. *Trends Cell Biol.* 2016; 26: 818–824. <https://doi.org/10.1016/j.tcb.2016.08.005> PMID: 27639630
2. Russell JJ, Theriot JA, Sood P, Marshall WF, Landweber LF, Fritz-Laylin L, et al. Non-model model organisms. *BMC Biol.* 2017; 15: 55. <https://doi.org/10.1186/s12915-017-0391-5> PMID: 28662661
3. Burki F, Kaplan M, Tikhonenkov DV, Zlatogursky V, Minh BQ, Radaykina LV, et al. Untangling the early diversification of eukaryotes: a phylogenomic study of the evolutionary origins of Centrohelida, Haptophyta and Cryptista. *Proc Biol Sci.* 2016;283.
4. Carradec Q, Pelletier E, Da Silva C, Alberti A, Seeleuthner Y, Blanc-Mathieu R, et al. A global ocean atlas of eukaryotic genes. *Nat Commun.* 2018; 9: 373. <https://doi.org/10.1038/s41467-017-02342-1> PMID: 29371626
5. Archibald JM. Endosymbiosis and eukaryotic cell evolution. *Curr Biol.* 2015; 25: R911–21. <https://doi.org/10.1016/j.cub.2015.07.055> PMID: 26439354
6. Loidl J. Conservation and variability of meiosis across the eukaryotes. *Annu Rev Genet.* 2016; 50: 293–316. <https://doi.org/10.1146/annurev-genet-120215-035100> PMID: 27686280
7. Speijer D, Lukes J, Elias M. Sex is a ubiquitous, ancient, and inherent attribute of eukaryotic life. *PNAS.* 2015; 112: 8827–8834. <https://doi.org/10.1073/pnas.1501725112> PMID: 26195746
8. Keeling PJ, Burki F, Wilcox HM, Allam B, Allen EE, Amaral-Zettler LA, et al. The Marine Microbial Eukaryote Transcriptome Sequencing Project (MMETSPP): illuminating the functional diversity of eukaryotic life in the oceans through transcriptome sequencing. *PLoS Biol.* 2014; 12: e1001889. <https://doi.org/10.1371/journal.pbio.1001889> PMID: 24959919
9. Worden AZ, Follows MJ, Giovannoni SJ, Wilken S, Zimmerman AE, Keeling PJ. Rethinking the marine carbon cycle: factoring in the multifarious lifestyles of microbes. *Science.* 2015; 347: 1257594. <https://doi.org/10.1126/science.1257594> PMID: 25678667
10. Charlson RJ, Lovelock JE, Andreae MO, Warren SG. Oceanic phytoplankton, atmospheric sulphur, cloud albedo and climate. *Nature.* 1987; 326: 655–661.
11. Behrenfeld MJ, Boss ES. Resurrecting the ecological underpinnings of ocean plankton blooms. *Ann Rev Mar Sci.* 2014; 6: 167–194. <https://doi.org/10.1146/annurev-marine-052913-021325> PMID: 24079309
12. Ziegler M, Eguíluz VM, Duarte CM, Voolstra CR. Rare symbionts may contribute to the resilience of coral-algal assemblages. *ISME J.* 2018; 12: 161–172. <https://doi.org/10.1038/ismej.2017.151> PMID: 29192903
13. Caron DA, Alexander H, Allen AE, Archibald JM, Armbrust EV, Bachy C, et al. Probing the evolution, ecology and physiology of marine protists using transcriptomics. *Nat Rev Microbiol.* 2017; 15: 6–20. <https://doi.org/10.1038/nrmicro.2016.160> PMID: 27867198
14. de Vargas C, Audic S, Henry N, Decelle J, Mahé F, Logares R, et al. Ocean plankton. Eukaryotic plankton diversity in the sunlit ocean. *Science.* 2015; 348: 1261605. <https://doi.org/10.1126/science.1261605> PMID: 25999516
15. Gornik SG, Ford KL, Mulhern TD, Bacic A, McFadden GI, Waller RF. Loss of nucleosomal DNA condensation coincides with appearance of a novel nuclear protein in dinoflagellates. *Curr Biol.* 2012; 22: 2303–2312. <https://doi.org/10.1016/j.cub.2012.10.036> PMID: 23159597
16. Roy S, Morse D. Transcription and maturation of mRNA in dinoflagellates. *Microorganisms.* 2013; 1: 71–99. <https://doi.org/10.3390/microorganisms1010071> PMID: 27694765
17. Wisecaver JH, Hackett JD. Dinoflagellate genome evolution. *Annu Rev Microbiol.* 2011; 65: 369–387. <https://doi.org/10.1146/annurev-micro-090110-102841> PMID: 21682644

18. Teytelman L, Stoliartchouk A, Kindler L, Hurwitz BL. Protocols.io: Virtual communities for protocol development and discussion. *PLoS Biol.* 2016; 14: e1002538. <https://doi.org/10.1371/journal.pbio.1002538> PMID: [27547938](https://pubmed.ncbi.nlm.nih.gov/27547938/)
